# Supplementary material for: Blocking the Hormone Receptors Modulates NLRP3 in LPS-Primed Breast Cancer Cells
Source: MDPI journal article supplement (doi:10.3390/ijms24054846), 2023-03-02
Supplement: s1 [file s1]

# Blocking the hormone receptors modulate NLRP3 in LPS-primed breast cancer cells.

## Supplementary Figures

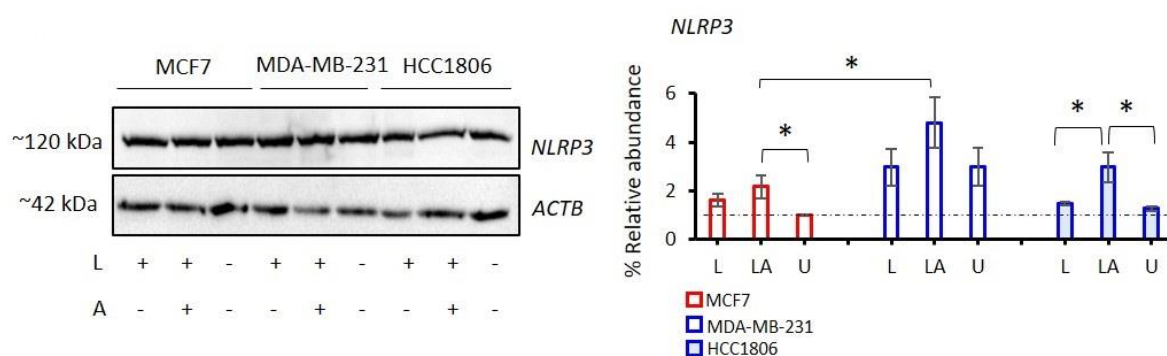

**Figure S1.** Western blot analysis of NLRP3 protein expression in MDA-MB-231, HCC1806 and MCF7 cells; Data represent two technical repeats. L: LPS-only, LA: LPS/ATP, U: Untreated. P value was calculated using the one-way ANOVA model with Tukey's post hoc tests \*p < 0.05.

## Supplementary Tables

**Table S1.** NLRP3 expression in MCF7, MDA-MB-231 and HCC1806 cells after NLRP3 activation

| Cell line  | Comparison | Mean Difference | Std. E. | P            | 95% CI |       |
|------------|------------|-----------------|---------|--------------|--------|-------|
|            |            |                 |         |              | Lower  | Upper |
| MCF7       | U-L        | -0.62           | 0.26    | 0.124        | -1.43  | 0.19  |
|            | U-LA       | -1.16           | 0.26    | <b>0.011</b> | -1.97  | -0.35 |
|            | L-LA       | -0.54           | 0.26    | 0.179        | -1.35  | 0.27  |
| MDA-MB-231 | U-L        | 0.02            | 0.71    | 1.000        | -2.18  | 2.21  |
|            | U-LA       | -1.82           | 0.71    | 0.096        | -4.01  | 0.37  |
|            | L-LA       | -1.83           | 0.71    | 0.094        | -4.03  | 0.36  |
| HCC1806    | U-L        | -0.21           | 0.30    | 0.780        | -1.13  | 0.72  |
|            | U-LA       | -1.70           | 0.30    | <b>0.003</b> | -2.62  | -0.77 |
|            | L-LA       | -1.49           | 0.30    | <b>0.006</b> | -2.42  | -0.57 |

P-value calculated using One Way Anova and Tukey Test. The mean difference is significant at the 0.05 level and showed in bold. U:

Untreated. L: LPS. LA: LPS/ATP. n=3 for MCF7 and MDA-MB-231; n=2 for HCC1806.

**Table S2.** IL-1 $\beta$  secretion of MDA-MB-231 and MCF7 cells after NLRP3 activation

| Dependent Variable |      | Mean Difference | Std. E | P                | 95% CI      |             |
|--------------------|------|-----------------|--------|------------------|-------------|-------------|
|                    |      |                 |        |                  | Lower Bound | Upper Bound |
| MDA-MB-231         | U-LA | -78.08          | 2.20   | <b>&lt;0.001</b> | -85.14      | -71.02      |
|                    | U-LA | -0.37           | 2.20   | 0.998            | -7.43       | 6.69        |
|                    | LA-L | 77.71           | 2.20   | <b>&lt;0.001</b> | 70.65       | 84.76       |
| MCF7               | U-LA | -0.23           | 0.11   | 0.224            | -0.59       | 0.12        |
|                    | U-LA | 0.01            | 0.11   | 1.000            | -0.34       | 0.36        |
|                    | LA-L | 0.24            | 0.11   | 0.199            | -0.11       | 0.60        |

P-value calculated using One Way Anova and Tukey Test. The mean difference is significant at the 0.05 level and showed in bold. U:

Untreated. L: LPS. LA: LPS/ATP. n=3.

**Table S3.** The time-dependent changes in tumospheres formed by MDA-MB-231 and MCF7 cells after LPS and LPS/ATP treatments

| Cell line  | Treatment | Comparison of incubation time | Mean Difference in sphere size | Std. E. | P            | 95% CI  |         |
|------------|-----------|-------------------------------|--------------------------------|---------|--------------|---------|---------|
|            |           |                               |                                |         |              | Lower   | Upper   |
| MDA-MB-231 | U         | 0h-4h                         | 112.60                         | 110.89  | 0.743        | -204.66 | 429.86  |
|            |           | 0h-24h                        | 327.40                         | 110.89  | <b>0.042</b> | 10.14   | 644.66  |
|            |           | 0h-48h                        | 552.00                         | 110.89  | <b>0.001</b> | 234.74  | 869.26  |
|            |           | 4h-24h                        | 214.80                         | 110.89  | 0.252        | -102.46 | 532.06  |
|            |           | 4h-48h                        | 439.40                         | 110.89  | <b>0.006</b> | 122.14  | 756.66  |
|            |           | 24h-48h                       | 224.60                         | 110.89  | 0.220        | -92.66  | 541.86  |
|            | L         | 0h-4h                         | 112.50                         | 260.57  | 0.972        | -661.12 | 886.12  |
|            |           | 0h-24h                        | 221.00                         | 260.57  | 0.831        | -552.62 | 994.62  |
|            |           | 0h-48h                        | 322.00                         | 260.57  | 0.617        | -451.62 | 1095.62 |
|            |           | 4h-24h                        | 108.50                         | 260.57  | 0.975        | -665.12 | 882.12  |
|            |           | 4h-48h                        | 209.50                         | 260.57  | 0.851        | -564.12 | 983.12  |
|            |           | 24h-48h                       | 101.00                         | 260.57  | 0.979        | -672.62 | 874.62  |
|            | LA        | 0h-4h                         | -144.00                        | 86.93   | 0.403        | -422.38 | 134.38  |
|            |           | 0h-24h                        | -400.83                        | 86.93   | <b>0.008</b> | -679.21 | -122.46 |
|            |           | 0h-48h                        | -454.00                        | 86.93   | <b>0.004</b> | -732.38 | -175.62 |

|      |    |         |         |       |              |         |        |
|------|----|---------|---------|-------|--------------|---------|--------|
|      |    | 4h-24h  | -256.83 | 86.93 | <b>0.071</b> | -535.21 | 21.54  |
|      |    | 4h-48h  | -310.00 | 86.93 | <b>0.030</b> | -588.38 | -31.62 |
|      |    | 24h-48h | -53.17  | 86.93 | 0.926        | -331.54 | 225.21 |
| MCF7 | U  | 0h-4h   | -15.80  | 36.03 | 0.971        | -119.65 | 88.05  |
|      |    | 0h-24h  | -144.70 | 38.22 | <b>0.009</b> | -254.84 | -34.56 |
|      |    | 0h-48h  | -165.01 | 36.03 | <b>0.002</b> | -268.86 | -61.16 |
|      |    | 4h-24h  | -128.90 | 38.22 | <b>0.020</b> | -239.04 | -18.76 |
|      |    | 4h-48h  | -149.21 | 36.03 | <b>0.004</b> | -253.06 | -45.36 |
|      |    | 24h-48h | -20.31  | 38.22 | 0.950        | -130.45 | 89.83  |
|      | L  | 0h-4h   | -123.54 | 37.94 | <b>0.023</b> | -232.09 | -15.00 |
|      |    | 0h-24h  | -182.74 | 37.94 | <b>0.001</b> | -291.29 | -74.20 |
|      |    | 0h-48h  | -188.08 | 37.94 | <b>0.001</b> | -296.62 | -79.53 |
|      |    | 4h-24h  | -59.20  | 37.94 | 0.427        | -167.74 | 49.34  |
|      |    | 4h-48h  | -64.53  | 37.94 | 0.355        | -173.08 | 44.01  |
|      |    | 24h-48h | -5.33   | 37.94 | 0.999        | -113.88 | 103.21 |
|      | LA | 0h-4h   | -86.50  | 31.64 | 0.062        | -176.45 | 3.45   |
|      |    | 0h-24h  | -65.75  | 35.05 | 0.275        | -165.39 | 33.89  |
|      |    | 0h-48h  | -138.76 | 31.64 | <b>0.002</b> | -228.70 | -48.81 |
|      |    | 4h-24h  | 20.75   | 33.73 | 0.926        | -75.13  | 116.63 |
|      |    | 4h-48h  | -52.26  | 30.17 | 0.338        | -138.02 | 33.50  |
|      |    | 24h-48h | -73.01  | 33.73 | 0.173        | -168.89 | 22.88  |

P-value calculated using One Way Anova and Tukey Test. The mean difference is significant at the 0.05 level and showed in bold. U: Untreated. L: LPS. LA: LPS/ATP. n=5.

**Table S4.** The comparison of tumosphere size formed by MDA-MB-231 and MCF7 cells upon 48 hours of incubation with LPS or LPS/ATP.

| Cell line  | Treatment | Mean Difference in sphere size | Std. E. | P            | 95% CI   |         |
|------------|-----------|--------------------------------|---------|--------------|----------|---------|
|            |           |                                |         |              | Lower    | Upper   |
| MDA-MB-231 | U-L       | 238.21                         | 127.85  | 0.205        | -118.76  | 595.18  |
|            | U-LA      | -392.51                        | 139.19  | <b>0.048</b> | -781.12  | -3.89   |
|            | LA-L      | -630.72                        | 145.57  | <b>0.005</b> | -1037.14 | -224.29 |
| MCF7       | U-L       | 80.62                          | 20.57   | <b>0.009</b> | 23.18    | 138.05  |
|            | U-LA      | -0.23                          | 22.40   | 1.000        | -62.76   | 62.30   |
|            | LA-L      | 80.84                          | 23.42   | <b>0.018</b> | 15.45    | 146.24  |

P-value calculated using One Way Anova and Tukey Test. The mean difference is significant at the 0.05 level and showed in bold. U: Untreated. L: LPS. LA: LPS/ATP. n=5.

**Table S5.** The effect of LPS-only and LPS/ATP on cell death in BC cells.

| Cell line  | Comparisons | Mean Difference | Std. E | P     | 95% CI      |             |
|------------|-------------|-----------------|--------|-------|-------------|-------------|
|            |             |                 |        |       | Lower Bound | Upper Bound |
| MDA-MB-231 | U-L         | -0.32           | 0.43   | 0.756 | -2.11       | 1.47        |
|            | U-LA        | -0.43           | 0.43   | 0.623 | -2.22       | 1.36        |
|            | L-LA        | -0.11           | 0.43   | 0.965 | -1.90       | 1.68        |
| MCF7       | U-L         | -0.86           | 1.12   | 0.747 | -5.52       | 3.81        |
|            | U-LA        | -0.84           | 1.12   | 0.756 | -5.50       | 3.83        |
|            | L-LA        | 0.02            | 1.12   | 1.000 | -4.65       | 4.69        |

P-value calculated using One Way Anova and Tukey Test. P values less than 0.05 were considered significant. U: Untreated. L: LPS. LA: LPS/ATP. n=3.

**Table S6.** The time-dependent changes in recovery of scratched wounded area after LPS and LPS/ATP treatments in BC cells

| Cell line  | Treatments | Comparisons | Mean Difference | Std. E | P     | 95% CI |        |
|------------|------------|-------------|-----------------|--------|-------|--------|--------|
|            |            |             |                 |        |       | Lower  | Upper  |
| MDA-MB-231 | U          | 0h-4h       | 64.25           | 34.12  | 0.279 | -34.94 | 163.44 |

|      |    |         |        |       |       |         |        |
|------|----|---------|--------|-------|-------|---------|--------|
|      |    | 0h-24h  | 346.20 | 32.37 | 0.000 | 252.10  | 440.30 |
|      |    | 0h-48h  | 417.00 | 32.37 | 0.000 | 322.90  | 511.10 |
|      |    | 4h-24h  | 281.95 | 32.37 | 0.000 | 187.85  | 376.05 |
|      |    | 4h-48h  | 352.75 | 32.37 | 0.000 | 258.65  | 446.85 |
|      |    | 24h-48h | 70.80  | 30.52 | 0.141 | -17.91  | 159.51 |
|      | L  | 0h-4h   | 99.42  | 32.35 | 0.039 | 4.46    | 194.37 |
|      |    | 0h-24h  | 298.07 | 30.93 | 0.000 | 207.27  | 388.86 |
|      |    | 0h-48h  | 363.87 | 30.93 | 0.000 | 273.07  | 454.66 |
|      |    | 4h-24h  | 198.65 | 28.42 | 0.000 | 115.25  | 282.05 |
|      |    | 4h-48h  | 264.45 | 28.42 | 0.000 | 181.05  | 347.85 |
|      |    | 24h-48h | 65.80  | 26.79 | 0.115 | -12.83  | 144.43 |
|      | LA | 0h-4h   | 31.08  | 24.55 | 0.604 | -45.56  | 107.73 |
|      |    | 0h-24h  | 25.00  | 26.25 | 0.778 | -56.94  | 106.94 |
|      |    | 0h-48h  | 26.67  | 26.25 | 0.745 | -55.27  | 108.61 |
|      |    | 4h-24h  | -6.08  | 24.55 | 0.994 | -82.73  | 70.56  |
|      |    | 4h-48h  | -4.42  | 24.55 | 0.998 | -81.06  | 72.23  |
|      |    | 24h-48h | 1.67   | 26.25 | 1.000 | -80.27  | 83.61  |
| MCF7 | U  | 0h-4h   | 68.58  | 44.27 | 0.441 | -62.85  | 200.01 |
|      |    | 0h-24h  | 194.85 | 38.88 | 0.001 | 79.41   | 310.29 |
|      |    | 0h-48h  | 200.50 | 40.99 | 0.002 | 78.82   | 322.18 |
|      |    | 4h-24h  | 126.27 | 42.33 | 0.049 | 0.59    | 251.94 |
|      |    | 4h-48h  | 131.92 | 44.27 | 0.049 | 0.49    | 263.35 |
|      |    | 24h-48h | 5.65   | 38.88 | 0.999 | -109.79 | 121.09 |
|      | L  | 0h-4h   | 49.75  | 26.60 | 0.284 | -27.57  | 127.07 |
|      |    | 0h-24h  | 116.85 | 25.24 | 0.002 | 43.49   | 190.21 |
|      |    | 0h-48h  | 170.85 | 25.24 | 0.000 | 97.49   | 244.21 |
|      |    | 4h-24h  | 67.10  | 25.24 | 0.078 | -6.26   | 140.46 |
|      |    | 4h-48h  | 121.10 | 25.24 | 0.001 | 47.74   | 194.46 |
|      |    | 24h-48h | 54.00  | 23.79 | 0.153 | -15.16  | 123.16 |
|      | LA | 0h-4h   | 6.17   | 33.01 | 0.998 | -94.82  | 107.15 |
|      |    | 0h-24h  | 16.50  | 30.56 | 0.947 | -76.99  | 109.99 |
|      |    | 0h-48h  | 39.83  | 33.01 | 0.637 | -61.15  | 140.82 |
|      |    | 4h-24h  | 10.33  | 33.01 | 0.989 | -90.65  | 111.32 |
|      |    | 4h-48h  | 33.67  | 35.29 | 0.777 | -74.29  | 141.62 |
|      |    | 24h-48h | 23.33  | 33.01 | 0.892 | -77.65  | 124.32 |

P-value calculated using One Way Anova and Tukey Test. The mean difference is significant at the 0.05 level and showed in bold. U:

Untreated. L: LPS. LA: LPS/ATP. n=5.

**Table S7.** The comparison of recovery of scratched wounded area of BC cells upon 48 hours of incubation with LPS or LPS/ATP.

| Cell line  | Incubation time | Comparisons | Mean Difference | Std. E | P                | 95% CI  |         |
|------------|-----------------|-------------|-----------------|--------|------------------|---------|---------|
|            |                 |             |                 |        |                  | Lower   | Upper   |
| MDA-MB-231 | 4h              | U-L         | 19.50           | 43.24  | 0.895            | -101.22 | 140.22  |
|            |                 | U-LA        | -43.50          | 43.24  | 0.592            | -164.22 | 77.22   |
|            |                 | L-LA        | -63.00          | 43.24  | 0.355            | -183.72 | 57.72   |
|            | 24h             | U-L         | -63.80          | 20.43  | <b>0.027</b>     | -119.80 | -7.80   |
|            |                 | U-LA        | -331.53         | 23.59  | <b>&lt;0.001</b> | -396.20 | -266.87 |
|            |                 | L-LA        | -267.73         | 23.59  | <b>&lt;0.001</b> | -332.40 | -203.07 |
|            | 48h             | U-L         | -68.80          | 11.16  | <b>&lt;0.001</b> | -99.38  | -38.22  |
|            |                 | U-LA        | -400.67         | 12.88  | <b>&lt;0.001</b> | -435.98 | -365.35 |
|            |                 | L-LA        | -331.87         | 12.88  | <b>&lt;0.001</b> | -367.18 | -296.55 |
| MCF7       | 4h              | U-L         | 5.17            | 24.40  | 0.976            | -66.70  | 77.04   |
|            |                 | U-LA        | -42.67          | 26.09  | 0.294            | -119.50 | 34.17   |
|            |                 | L-LA        | -47.83          | 24.40  | 0.192            | -119.70 | 24.04   |
|            | 24h             | U-L         | -54.00          | 35.01  | 0.310            | -148.55 | 40.55   |
|            |                 | U-LA        | -158.60         | 37.13  | <b>0.003</b>     | -258.88 | -58.32  |
|            |                 | L-LA        | -104.60         | 37.13  | <b>0.041</b>     | -204.88 | -4.32   |
|            | 48h             | U-L         | -5.65           | 31.29  | 0.982            | -93.01  | 81.71   |
|            |                 | U-LA        | -140.92         | 35.63  | <b>0.008</b>     | -240.39 | -41.45  |
|            |                 | L-LA        | -135.27         | 34.07  | <b>0.008</b>     | -230.38 | -40.16  |

P-value calculated using One Way Anova and Tukey Test. The mean difference is significant at the 0.05 level and showed in bold. U:

Untreated. L: LPS. LA: LPS/ATP. n=5.

**Table S8.** Comparison of cytokine secretion levels in untreated MDA-MB-231 and MCF7 cells.

|         |            | Median | SD   | SE   | Min  | Max  | Z     | P     |
|---------|------------|--------|------|------|------|------|-------|-------|
| CTACK   | MDA-MB-231 | 0.33   | 0.00 | 0.00 | 0.33 | 0.33 | 0.00  | 1.000 |
|         | MCF7       | 0.33   | 0.00 | 0.00 | 0.33 | 0.33 |       |       |
| Eotaxin | MDA-MB-231 | 0.04   | 0.02 | 0.01 | 0.01 | 0.04 | -1.58 | 0.114 |

|          |            |       |        |        |       |        |       |              |
|----------|------------|-------|--------|--------|-------|--------|-------|--------------|
|          | MCF7       | 0.01  | 0.00   | 0.00   | 0.01  | 0.01   |       |              |
| G-CSF    | MDA-MB-231 | 50.57 | 429.73 | 248.10 | 33.95 | 786.43 | -2.09 | <b>0.037</b> |
|          | MCF7       | 0.09  | 0.00   | 0.00   | 0.09  | 0.09   |       |              |
| GM-CSF   | MDA-MB-231 | 0.66  | 25.91  | 14.96  | 0.07  | 45.24  | -1.55 | 0.121        |
|          | MCF7       | 0.07  | 0.00   | 0.00   | 0.07  | 0.07   |       |              |
| GRO-a    | MDA-MB-231 | 21.67 | 104.26 | 60.20  | 21.67 | 202.26 | -1.00 | 0.317        |
|          | MCF7       | 21.67 | 0.00   | 0.00   | 21.67 | 21.67  |       |              |
| HGF      | MDA-MB-231 | 3.79  | 2.13   | 1.23   | 0.10  | 3.79   | -0.90 | 0.369        |
|          | MCF7       | 0.45  | 1.02   | 0.59   | 0.10  | 2.02   |       |              |
| IFN-a2   | MDA-MB-231 | 0.48  | 0.00   | 0.00   | 0.48  | 0.48   | 0.00  | 1.000        |
|          | MCF7       | 0.48  | 0.00   | 0.00   | 0.48  | 0.48   |       |              |
| IFN-g    | MDA-MB-231 | 0.56  | 0.29   | 0.17   | 0.18  | 0.74   | -1.53 | 0.127        |
|          | MCF7       | 0.14  | 0.23   | 0.13   | 0.02  | 0.46   |       |              |
| IL-10    | MDA-MB-231 | 0.14  | 0.00   | 0.00   | 0.14  | 0.14   | 0.00  | 1.000        |
|          | MCF7       | 0.14  | 0.00   | 0.00   | 0.14  | 0.14   |       |              |
| IL-12p40 | MDA-MB-231 | 1.92  | 29.50  | 17.03  | 1.92  | 53.01  | -1.00 | 0.317        |
|          | MCF7       | 1.92  | 0.00   | 0.00   | 1.92  | 1.92   |       |              |
| IL-12p70 | MDA-MB-231 | 0.12  | 0.00   | 0.00   | 0.12  | 0.12   | 0.00  | 1.000        |
|          | MCF7       | 0.12  | 0.00   | 0.00   | 0.12  | 0.12   |       |              |
| IL-13    | MDA-MB-231 | 0.05  | 0.05   | 0.03   | 0.05  | 0.14   | -0.26 | 0.796        |
|          | MCF7       | 0.05  | 0.18   | 0.11   | 0.05  | 0.37   |       |              |
| IL-15    | MDA-MB-231 | 5.80  | 0.00   | 0.00   | 5.80  | 5.80   | 0.00  | 1.000        |
|          | MCF7       | 5.80  | 0.00   | 0.00   | 5.80  | 5.80   |       |              |
| IL-16    | MDA-MB-231 | 0.23  | 3.26   | 1.88   | 0.13  | 5.83   | -1.55 | 0.121        |
|          | MCF7       | 0.13  | 0.00   | 0.00   | 0.13  | 0.13   |       |              |
| IL-17    | MDA-MB-231 | 0.23  | 0.00   | 0.00   | 0.23  | 0.23   | 0.00  | 1.000        |
|          | MCF7       | 0.23  | 0.00   | 0.00   | 0.23  | 0.23   |       |              |
| IL-18    | MDA-MB-231 | 1.04  | 1.46   | 0.84   | 0.63  | 3.34   | -2.09 | <b>0.037</b> |
|          | MCF7       | 0.16  | 0.00   | 0.00   | 0.16  | 0.16   |       |              |
| IL-1Ra   | MDA-MB-231 | 52.62 | 143.25 | 82.71  | 9.23  | 276.18 | -1.55 | 0.121        |
|          | MCF7       | 9.23  | 0.00   | 0.00   | 9.23  | 9.23   |       |              |
| IL-1a    | MDA-MB-231 | 1.73  | 1.41   | 0.82   | 0.04  | 2.85   | -1.16 | 0.246        |
|          | MCF7       | 0.04  | 0.16   | 0.09   | 0.04  | 0.31   |       |              |
| IL-1b    | MDA-MB-231 | 0.01  | 0.06   | 0.04   | 0.01  | 0.12   | -0.26 | 0.796        |
|          | MCF7       | 0.01  | 0.01   | 0.00   | 0.01  | 0.02   |       |              |
| IL-2     | MDA-MB-231 | 0.52  | 0.00   | 0.00   | 0.52  | 0.52   | 0.00  | 1.000        |
|          | MCF7       | 0.52  | 0.00   | 0.00   | 0.52  | 0.52   |       |              |
| IL-2Ra   | MDA-MB-231 | 0.14  | 0.00   | 0.00   | 0.14  | 0.14   | -1.00 | 0.317        |
|          | MCF7       | 0.14  | 0.59   | 0.34   | 0.14  | 1.17   |       |              |
| IL-3     | MDA-MB-231 | 0.02  | 0.02   | 0.01   | 0.01  | 0.04   | -0.94 | 0.346        |
|          | MCF7       | 0.01  | 0.01   | 0.00   | 0.01  | 0.02   |       |              |
| IL-4     | MDA-MB-231 | 0.14  | 0.00   | 0.00   | 0.14  | 0.14   | 0.00  | 1.000        |
|          | MCF7       | 0.14  | 0.00   | 0.00   | 0.14  | 0.14   |       |              |
| IL-5     | MDA-MB-231 | 1.13  | 0.00   | 0.00   | 1.13  | 1.13   | 0.00  | 1.000        |
|          | MCF7       | 1.13  | 0.00   | 0.00   | 1.13  | 1.13   |       |              |
| IL-6     | MDA-MB-231 | 11.33 | 45.46  | 26.25  | 0.30  | 83.98  | -1.55 | 0.121        |
|          | MCF7       | 0.30  | 0.00   | 0.00   | 0.30  | 0.30   |       |              |
| IL-7     | MDA-MB-231 | 0.35  | 1.23   | 0.71   | 0.17  | 2.39   | -1.55 | 0.121        |
|          | MCF7       | 0.17  | 0.00   | 0.00   | 0.17  | 0.17   |       |              |
| IL-8     | MDA-MB-231 | 0.26  | 1.84   | 1.06   | 0.26  | 3.45   | -1.00 | 0.317        |
|          | MCF7       | 0.26  | 0.00   | 0.00   | 0.26  | 0.26   |       |              |
| IL-9     | MDA-MB-231 | 0.05  | 0.00   | 0.00   | 0.05  | 0.05   | 0.00  | 1.000        |
|          | MCF7       | 0.05  | 0.00   | 0.00   | 0.05  | 0.05   |       |              |
| IP10     | MDA-MB-231 | 2.40  | 39.68  | 22.91  | 2.11  | 70.98  | -1.96 | <b>0.050</b> |
|          | MCF7       | 0.70  | 0.81   | 0.47   | 0.44  | 1.96   |       |              |
| LIF      | MDA-MB-231 | 3.29  | 12.63  | 7.29   | 3.29  | 25.16  | -1.00 | 0.317        |
|          | MCF7       | 3.29  | 0.00   | 0.00   | 3.29  | 3.29   |       |              |
| M-CSF    | MDA-MB-231 | 1.28  | 1.21   | 0.70   | 0.01  | 2.42   | -1.55 | 0.121        |
|          | MCF7       | 0.01  | 0.00   | 0.00   | 0.01  | 0.01   |       |              |
| MCP-1    | MDA-MB-231 | 1.58  | 0.69   | 0.40   | 0.56  | 1.88   | -2.09 | <b>0.037</b> |
|          | MCF7       | 0.11  | 0.00   | 0.00   | 0.11  | 0.11   |       |              |
| MCP-3    | MDA-MB-231 | 0.06  | 0.13   | 0.07   | 0.02  | 0.26   | -1.55 | 0.121        |
|          | MCF7       | 0.02  | 0.00   | 0.00   | 0.02  | 0.02   |       |              |
| MIF      | MDA-MB-231 | 23.53 | 73.52  | 42.45  | 1.68  | 138.53 | -0.22 | 0.827        |
|          | MCF7       | 28.94 | 35.92  | 20.74  | 8.12  | 78.07  |       |              |
| MIG      | MDA-MB-231 | 0.04  | 0.00   | 0.00   | 0.04  | 0.04   | 0.00  | 1.000        |
|          | MCF7       | 0.04  | 0.00   | 0.00   | 0.04  | 0.04   |       |              |
| MIP-1a   | MDA-MB-231 | 0.26  | 0.10   | 0.06   | 0.19  | 0.39   | -2.09 | <b>0.037</b> |
|          | MCF7       | 0.03  | 0.00   | 0.00   | 0.03  | 0.03   |       |              |
| MIP-1b   | MDA-MB-231 | 1.05  | 1.27   | 0.73   | 0.20  | 2.70   | 0.00  | 1.000        |
|          | MCF7       | 0.87  | 3.02   | 1.75   | 0.20  | 5.74   |       |              |
| PDGF-BB  | MDA-MB-231 | 0.24  | 0.00   | 0.00   | 0.24  | 0.24   | -1.00 | 0.317        |

|        |            |      |       |       |      |       |       |              |
|--------|------------|------|-------|-------|------|-------|-------|--------------|
|        | MCF7       | 0.24 | 1.28  | 0.74  | 0.24 | 2.45  |       |              |
| RANTES | MDA-MB-231 | 0.01 | 1.53  | 0.88  | 0.01 | 2.66  | -0.26 | 0.796        |
|        | MCF7       | 0.01 | 0.84  | 0.48  | 0.01 | 1.46  |       |              |
| SCF    | MDA-MB-231 | 0.50 | 0.99  | 0.57  | 0.50 | 2.21  | -2.12 | <b>0.034</b> |
|        | MCF7       | 0.02 | 0.00  | 0.00  | 0.02 | 0.02  |       |              |
| SCGF-b | MDA-MB-231 | 7.82 | 0.00  | 0.00  | 7.82 | 7.82  | 0.00  | 1.000        |
|        | MCF7       | 7.82 | 0.00  | 0.00  | 7.82 | 7.82  |       |              |
| SDF-1a | MDA-MB-231 | 1.52 | 0.91  | 0.52  | 1.52 | 3.09  | -0.26 | 0.796        |
|        | MCF7       | 1.52 | 1.20  | 0.69  | 1.52 | 3.59  |       |              |
| TNF-a  | MDA-MB-231 | 0.14 | 36.44 | 21.04 | 0.14 | 63.25 | -1.00 | 0.317        |
|        | MCF7       | 0.14 | 0.00  | 0.00  | 0.14 | 0.14  |       |              |
| TNF-b  | MDA-MB-231 | 0.30 | 0.00  | 0.00  | 0.30 | 0.30  | 0.00  | 1.000        |
|        | MCF7       | 0.30 | 0.00  | 0.00  | 0.30 | 0.30  |       |              |
| TRAIL  | MDA-MB-231 | 0.10 | 0.02  | 0.01  | 0.07 | 0.10  | -1.29 | 0.197        |
|        | MCF7       | 0.10 | 0.40  | 0.23  | 0.10 | 0.80  |       |              |
| VEGF   | MDA-MB-231 | 5.35 | 2.59  | 1.50  | 5.35 | 9.84  | -1.00 | 0.317        |
|        | MCF7       | 5.35 | 0.00  | 0.00  | 5.35 | 5.35  |       |              |
| b-NGF  | MDA-MB-231 | 0.85 | 0.00  | 0.00  | 0.85 | 0.85  | 0.00  | 1.000        |
|        | MCF7       | 0.85 | 0.00  | 0.00  | 0.85 | 0.85  |       |              |
| bFGF   | MDA-MB-231 | 5.55 | 3.43  | 1.98  | 1.02 | 7.75  | -1.55 | 0.121        |
|        | MCF7       | 1.02 | 0.00  | 0.00  | 1.02 | 1.02  |       |              |

**SD:** Standard deviation, **SE:** Standard error, **Min:** Minimum, **Max:** maximum.

P value was calculated using Mann-Whitney U test. P values less than 0.05 was shown in bold. **U:** Untreated, **LA:** LPS/ATP (n=3)

**Table S9.** IL-8 and MCP-1 secretion of MDA-MB-231 and MCF7 cells after NLRP3 activation

|       |            | t-test for Equality of Means |    |                  |                 |         |        |       |
|-------|------------|------------------------------|----|------------------|-----------------|---------|--------|-------|
|       |            | t                            | df | P                | Mean Difference | Std. E. | 95% CI |       |
| IL-8  | MCF-7      | -6.72                        | 4  | <b>0.003</b>     | -2.36           | 0.35    | -3.33  | -1.38 |
|       | MDA-MB-231 | -21.06                       | 4  | <b>&lt;0.001</b> | -4.39           | 0.21    | -4.96  | -3.81 |
| MCP-1 | MCF-7      | -5.44                        | 4  | <b>0.006</b>     | -2.37           | 0.44    | -3.58  | -1.16 |
|       | MDA-MB-231 | -21.43                       | 4  | <b>&lt;0.001</b> | -8.44           | 0.39    | -9.54  | -7.35 |

P-value calculated using an Independent Sample T Test. The mean difference is significant at the 0.05 level and showed in bold. U:

Untreated. L: LPS. LA: LPS/ATP. n=3.

**Table S10.** Cytokine secretion levels in MDA-MB-231 cells after LPS-only and LPS/ATP treatments.

|          |    | Median  | SD       | SE       | Min    | Max      | Z     | P            |
|----------|----|---------|----------|----------|--------|----------|-------|--------------|
| CTACK    | U  | 0.33    | 0.00     | 0.00     | 0.33   | 0.33     | -2.09 | <b>0.037</b> |
|          | LA | 4.54    | 0.85     | 0.49     | 4.09   | 5.73     |       |              |
| Eotaxin  | U  | 0.04    | 0.02     | 0.01     | 0.01   | 0.04     | -0.90 | 0.369        |
|          | LA | 0.14    | 0.10     | 0.06     | 0.01   | 0.20     |       |              |
| G-CSF    | U  | 50.57   | 429.73   | 248.10   | 33.95  | 786.43   | -1.53 | 0.127        |
|          | LA | 2318.10 | 20175.85 | 11648.53 | 143.96 | 36125.87 |       |              |
| GM-CSF   | U  | 0.66    | 25.91    | 14.96    | 0.07   | 45.24    | -0.44 | 0.658        |
|          | LA | 11.83   | 165.92   | 95.79    | 0.07   | 293.15   |       |              |
| GRO-a    | U  | 21.67   | 104.26   | 60.20    | 21.67  | 202.26   | -1.16 | 0.246        |
|          | LA | 2819.67 | 1663.83  | 960.61   | 21.67  | 2980.59  |       |              |
| HGF      | U  | 3.79    | 2.13     | 1.23     | 0.10   | 3.79     | -1.99 | <b>0.046</b> |
|          | LA | 8.82    | 3.88     | 2.24     | 4.59   | 12.34    |       |              |
| IFN-a2   | U  | 0.48    | 0.00     | 0.00     | 0.48   | 0.48     | -1.00 | 0.317        |
|          | LA | 0.48    | 0.13     | 0.07     | 0.48   | 0.70     |       |              |
| IFN-g    | U  | 0.56    | 0.29     | 0.17     | 0.18   | 0.74     | -1.09 | 0.275        |
|          | LA | 1.00    | 0.69     | 0.40     | 0.45   | 1.83     |       |              |
| IL-10    | U  | 0.14    | 0.00     | 0.00     | 0.14   | 0.14     | -1.55 | 0.121        |
|          | LA | 0.60    | 5.02     | 2.90     | 0.14   | 9.05     |       |              |
| IL-12p40 | U  | 1.92    | 29.50    | 17.03    | 1.92   | 53.01    | -0.23 | 0.817        |
|          | LA | 4.23    | 15.40    | 8.89     | 1.92   | 29.67    |       |              |
| IL-12p70 | U  | 0.12    | 0.00     | 0.00     | 0.12   | 0.12     | -1.00 | 0.317        |
|          | LA | 0.12    | 0.77     | 0.45     | 0.12   | 1.46     |       |              |
| IL-13    | U  | 0.05    | 0.05     | 0.03     | 0.05   | 0.14     | -0.70 | 0.487        |
|          | LA | 0.08    | 0.67     | 0.39     | 0.05   | 1.22     |       |              |
| IL-15    | U  | 5.80    | 0.00     | 0.00     | 5.80   | 5.80     | -1.55 | 0.121        |
|          | LA | 51.86   | 36.71    | 21.19    | 5.80   | 78.34    |       |              |
| IL-16    | U  | 0.23    | 3.26     | 1.88     | 0.13   | 5.83     | -0.65 | 0.513        |
|          | LA | 1.99    | 1.58     | 0.91     | 1.52   | 4.46     |       |              |
| IL-17    | U  | 0.23    | 0.00     | 0.00     | 0.23   | 0.23     | -1.55 | 0.121        |
|          | LA | 0.31    | 0.32     | 0.18     | 0.23   | 0.82     |       |              |

|         |    |       |         |         |       |         |       |              |
|---------|----|-------|---------|---------|-------|---------|-------|--------------|
| IL-18   | U  | 1.04  | 1.46    | 0.84    | 0.63  | 3.34    | -1.09 | 0.275        |
|         | LA | 3.20  | 544.83  | 314.56  | 2.26  | 946.40  |       |              |
| IL-1Ra  | U  | 52.62 | 143.25  | 82.71   | 9.23  | 276.18  | -0.44 | 0.658        |
|         | LA | 19.59 | 27.72   | 16.00   | 9.23  | 61.57   |       |              |
| IL-1a   | U  | 1.73  | 1.41    | 0.82    | 0.04  | 2.85    | -1.96 | <b>0.050</b> |
|         | LA | 3.22  | 0.33    | 0.19    | 3.14  | 3.74    |       |              |
| IL-1b   | U  | 0.01  | 0.06    | 0.04    | 0.01  | 0.12    | -1.99 | <b>0.046</b> |
|         | LA | 0.43  | 1.47    | 0.85    | 0.33  | 2.93    |       |              |
| IL-2    | U  | 0.52  | 0.00    | 0.00    | 0.52  | 0.52    | -1.55 | 0.121        |
|         | LA | 1.91  | 1.69    | 0.97    | 0.52  | 3.88    |       |              |
| IL-2Ra  | U  | 0.14  | 0.00    | 0.00    | 0.14  | 0.14    | -1.00 | 0.317        |
|         | LA | 0.14  | 1.22    | 0.70    | 0.14  | 2.25    |       |              |
| IL-3    | U  | 0.02  | 0.02    | 0.01    | 0.01  | 0.04    | -1.96 | <b>0.050</b> |
|         | LA | 0.11  | 80.64   | 46.56   | 0.05  | 139.75  |       |              |
| IL-4    | U  | 0.14  | 0.00    | 0.00    | 0.14  | 0.14    | -1.55 | 0.121        |
|         | LA | 0.58  | 0.29    | 0.17    | 0.14  | 0.68    |       |              |
| IL-5    | U  | 1.13  | 0.00    | 0.00    | 1.13  | 1.13    | -1.55 | 0.121        |
|         | LA | 21.04 | 17.53   | 10.12   | 1.13  | 36.07   |       |              |
| IL-6    | U  | 11.33 | 45.46   | 26.25   | 0.30  | 83.98   | -0.65 | 0.513        |
|         | LA | 75.79 | 1516.63 | 875.63  | 6.77  | 2667.48 |       |              |
| IL-7    | U  | 0.35  | 1.23    | 0.71    | 0.17  | 2.39    | 0.00  | 1.000        |
|         | LA | 1.70  | 0.92    | 0.53    | 0.17  | 1.82    |       |              |
| IL-8    | U  | 0.26  | 1.84    | 1.06    | 0.26  | 3.45    | -1.99 | <b>0.046</b> |
|         | LA | 18.41 | 3545.72 | 2047.12 | 4.42  | 6152.77 |       |              |
| IL-9    | U  | 0.05  | 0.00    | 0.00    | 0.05  | 0.05    | -2.09 | <b>0.037</b> |
|         | LA | 6.66  | 3.23    | 1.87    | 2.68  | 9.08    |       |              |
| IP10    | U  | 2.40  | 39.68   | 22.91   | 2.11  | 70.98   | -1.09 | 0.275        |
|         | LA | 22.63 | 259.73  | 149.96  | 14.41 | 468.33  |       |              |
| LIF     | U  | 3.29  | 12.63   | 7.29    | 3.29  | 25.16   | -1.55 | 0.121        |
|         | LA | 60.52 | 36.24   | 20.92   | 21.54 | 93.94   |       |              |
| M-CSF   | U  | 1.28  | 1.21    | 0.70    | 0.01  | 2.42    | -1.96 | <b>0.050</b> |
|         | LA | 23.85 | 11.33   | 6.54    | 8.76  | 30.94   |       |              |
| MCP-1   | U  | 1.58  | 0.69    | 0.40    | 0.56  | 1.88    | -1.96 | <b>0.050</b> |
|         | LA | 8.75  | 3.74    | 2.16    | 7.77  | 14.69   |       |              |
| MCP-3   | U  | 0.06  | 0.13    | 0.07    | 0.02  | 0.26    | -0.44 | 0.658        |
|         | LA | 0.17  | 2.12    | 1.23    | 0.02  | 3.77    |       |              |
| MIF     | U  | 23.53 | 73.52   | 42.45   | 1.68  | 138.53  | -0.22 | 0.827        |
|         | LA | 20.00 | 222.00  | 128.17  | 2.90  | 395.68  |       |              |
| MIG     | U  | 0.04  | 0.00    | 0.00    | 0.04  | 0.04    | -1.55 | 0.121        |
|         | LA | 1.42  | 1.66    | 0.96    | 0.04  | 3.34    |       |              |
| MIP-1a  | U  | 0.26  | 0.10    | 0.06    | 0.19  | 0.39    | -1.96 | <b>0.050</b> |
|         | LA | 0.47  | 0.06    | 0.03    | 0.41  | 0.53    |       |              |
| MIP-1b  | U  | 1.05  | 1.27    | 0.73    | 0.20  | 2.70    | -0.44 | 0.658        |
|         | LA | 1.64  | 1.52    | 0.88    | 0.20  | 3.23    |       |              |
| PDGF-BB | U  | 0.24  | 0.00    | 0.00    | 0.24  | 0.24    | 0.00  | 1.000        |
|         | LA | 0.24  | 0.00    | 0.00    | 0.24  | 0.24    |       |              |
| RANTES  | U  | 0.01  | 1.53    | 0.88    | 0.01  | 2.66    | -1.99 | <b>0.046</b> |
|         | LA | 11.24 | 5.25    | 3.03    | 4.65  | 15.02   |       |              |
| SCF     | U  | 0.50  | 0.99    | 0.57    | 0.50  | 2.21    | -1.99 | <b>0.046</b> |
|         | LA | 7.52  | 2.83    | 1.63    | 3.85  | 9.42    |       |              |
| SCGF-b  | U  | 7.82  | 0.00    | 0.00    | 7.82  | 7.82    | -1.00 | 0.317        |
|         | LA | 7.82  | 79.83   | 46.09   | 7.82  | 146.09  |       |              |
| SDF-1a  | U  | 1.52  | 0.91    | 0.52    | 1.52  | 3.09    | -0.26 | 0.796        |
|         | LA | 1.52  | 0.98    | 0.56    | 1.52  | 3.21    |       |              |
| TNF-a   | U  | 0.14  | 36.44   | 21.04   | 0.14  | 63.25   | -0.66 | 0.507        |
|         | LA | 3.36  | 7.79    | 4.50    | 2.48  | 16.39   |       |              |
| TNF-b   | U  | 0.30  | 0.00    | 0.00    | 0.30  | 0.30    | -1.55 | 0.121        |
|         | LA | 1.63  | 5.49    | 3.17    | 0.30  | 10.41   |       |              |
| TRAIL   | U  | 0.10  | 0.02    | 0.01    | 0.07  | 0.10    | -1.62 | 0.105        |
|         | LA | 0.24  | 0.47    | 0.27    | 0.10  | 0.97    |       |              |
| VEGF    | U  | 5.35  | 2.59    | 1.50    | 5.35  | 9.84    | -0.26 | 0.796        |
|         | LA | 5.35  | 133.67  | 77.18   | 5.35  | 236.88  |       |              |
| b-NGF   | U  | 0.85  | 0.00    | 0.00    | 0.85  | 0.85    | 0.00  | 1.000        |
|         | LA | 0.85  | 0.00    | 0.00    | 0.85  | 0.85    |       |              |
| bFGF    | U  | 5.55  | 3.43    | 1.98    | 1.02  | 7.75    | -1.33 | 0.184        |
|         | LA | 10.78 | 7.79    | 4.50    | 5.55  | 20.87   |       |              |

**SD:** Standard deviation, **SE:** Standard error, **Min:** Minimum, **Max:** maximum.

P value was calculated using Mann-Whitney U test. P values less than 0.05 was shown in bold. **U:** Untreated, **LA:** LPS/ATP (n=3)

**Table S11:** Cytokine secretion levels in MCF7 cells after LPS-only and LPS/ATP treatments.

|          |    | Median | SD     | SE    | Min   | Max    | Z     | P            |
|----------|----|--------|--------|-------|-------|--------|-------|--------------|
| CTACK    | U  | 0.33   | 0.00   | 0.00  | 0.33  | 0.33   | 0.00  | 1.000        |
|          | LA | 0.33   | 0.00   | 0.00  | 0.33  | 0.33   |       |              |
| Eotaxin  | U  | 0.01   | 0.00   | 0.00  | 0.01  | 0.01   | -1.00 | 0.317        |
|          | LA | 0.01   | 0.20   | 0.11  | 0.01  | 0.35   |       |              |
| G-CSF    | U  | 0.09   | 0.00   | 0.00  | 0.09  | 0.09   | -1.00 | 0.317        |
|          | LA | 0.09   | 4.52   | 2.61  | 0.09  | 7.92   |       |              |
| GM-CSF   | U  | 0.07   | 0.00   | 0.00  | 0.07  | 0.07   | -1.00 | 0.317        |
|          | LA | 0.07   | 0.18   | 0.10  | 0.07  | 0.38   |       |              |
| GRO-a    | U  | 21.67  | 0.00   | 0.00  | 21.67 | 21.67  | 0.00  | 1.000        |
|          | LA | 21.67  | 0.00   | 0.00  | 21.67 | 21.67  |       |              |
| HGF      | U  | 0.45   | 1.02   | 0.59  | 0.10  | 2.02   | -0.89 | 0.376        |
|          | LA | 1.88   | 0.20   | 0.12  | 1.62  | 2.02   |       |              |
| IFN-a2   | U  | 0.48   | 0.00   | 0.00  | 0.48  | 0.48   | 0.00  | 1.000        |
|          | LA | 0.48   | 0.00   | 0.00  | 0.48  | 0.48   |       |              |
| IFN-g    | U  | 0.14   | 0.23   | 0.13  | 0.02  | 0.46   | -0.44 | 0.658        |
|          | LA | 0.13   | 0.17   | 0.10  | 0.02  | 0.36   |       |              |
| IL-10    | U  | 0.14   | 0.00   | 0.00  | 0.14  | 0.14   | 0.00  | 1.000        |
|          | LA | 0.14   | 0.00   | 0.00  | 0.14  | 0.14   |       |              |
| IL-12p40 | U  | 1.92   | 0.00   | 0.00  | 1.92  | 1.92   | -1.00 | 0.317        |
|          | LA | 1.92   | 13.49  | 7.79  | 1.92  | 25.29  |       |              |
| IL-12p70 | U  | 0.12   | 0.00   | 0.00  | 0.12  | 0.12   | 0.00  | 1.000        |
|          | LA | 0.12   | 0.00   | 0.00  | 0.12  | 0.12   |       |              |
| IL-13    | U  | 0.05   | 0.18   | 0.11  | 0.05  | 0.37   | -1.00 | 0.317        |
|          | LA | 0.05   | 0.00   | 0.00  | 0.05  | 0.05   |       |              |
| IL-15    | U  | 5.80   | 0.00   | 0.00  | 5.80  | 5.80   | 0.00  | 1.000        |
|          | LA | 5.80   | 0.00   | 0.00  | 5.80  | 5.80   |       |              |
| IL-16    | U  | 0.13   | 0.00   | 0.00  | 0.13  | 0.13   | 0.00  | 1.000        |
|          | LA | 0.13   | 0.00   | 0.00  | 0.13  | 0.13   |       |              |
| IL-17    | U  | 0.23   | 0.00   | 0.00  | 0.23  | 0.23   | 0.00  | 1.000        |
|          | LA | 0.23   | 0.00   | 0.00  | 0.23  | 0.23   |       |              |
| IL-18    | U  | 0.16   | 0.00   | 0.00  | 0.16  | 0.16   | 0.00  | 1.000        |
|          | LA | 0.16   | 0.00   | 0.00  | 0.16  | 0.16   |       |              |
| IL-1Ra   | U  | 9.23   | 0.00   | 0.00  | 9.23  | 9.23   | -1.58 | 0.114        |
|          | LA | 14.86  | 3.25   | 1.88  | 9.23  | 14.86  |       |              |
| IL-1a    | U  | 0.04   | 0.16   | 0.09  | 0.04  | 0.31   | -1.00 | 0.317        |
|          | LA | 0.04   | 0.00   | 0.00  | 0.04  | 0.04   |       |              |
| IL-1b    | U  | 0.01   | 0.01   | 0.00  | 0.01  | 0.02   | -1.00 | 0.317        |
|          | LA | 0.01   | 0.00   | 0.00  | 0.01  | 0.01   |       |              |
| IL-2     | U  | 0.52   | 0.00   | 0.00  | 0.52  | 0.52   | 0.00  | 1.000        |
|          | LA | 0.52   | 0.00   | 0.00  | 0.52  | 0.52   |       |              |
| IL-2Ra   | U  | 0.14   | 0.59   | 0.34  | 0.14  | 1.17   | -1.00 | 0.317        |
|          | LA | 0.14   | 0.00   | 0.00  | 0.14  | 0.14   |       |              |
| IL-3     | U  | 0.01   | 0.01   | 0.00  | 0.01  | 0.02   | -1.16 | 0.246        |
|          | LA | 0.03   | 0.03   | 0.02  | 0.01  | 0.07   |       |              |
| IL-4     | U  | 0.14   | 0.00   | 0.00  | 0.14  | 0.14   | 0.00  | 1.000        |
|          | LA | 0.14   | 0.00   | 0.00  | 0.14  | 0.14   |       |              |
| IL-5     | U  | 1.13   | 0.00   | 0.00  | 1.13  | 1.13   | 0.00  | 1.000        |
|          | LA | 1.13   | 0.00   | 0.00  | 1.13  | 1.13   |       |              |
| IL-6     | U  | 0.30   | 0.00   | 0.00  | 0.30  | 0.30   | 0.00  | 1.000        |
|          | LA | 0.30   | 0.00   | 0.00  | 0.30  | 0.30   |       |              |
| IL-7     | U  | 0.17   | 0.00   | 0.00  | 0.17  | 0.17   | 0.00  | 1.000        |
|          | LA | 0.17   | 0.00   | 0.00  | 0.17  | 0.17   |       |              |
| IL-8     | U  | 0.26   | 0.00   | 0.00  | 0.26  | 0.26   | -1.00 | 0.317        |
|          | LA | 0.26   | 2.06   | 1.19  | 0.26  | 3.83   |       |              |
| IL-9     | U  | 0.05   | 0.00   | 0.00  | 0.05  | 0.05   | 0.00  | 1.000        |
|          | LA | 0.05   | 0.00   | 0.00  | 0.05  | 0.05   |       |              |
| IP10     | U  | 0.70   | 0.81   | 0.47  | 0.44  | 1.96   | 0.00  | 1.000        |
|          | LA | 0.92   | 0.56   | 0.32  | 0.44  | 1.56   |       |              |
| LIF      | U  | 3.29   | 0.00   | 0.00  | 3.29  | 3.29   | -2.09 | <b>0.037</b> |
|          | LA | 26.83  | 0.84   | 0.48  | 26.01 | 27.68  |       |              |
| M-CSF    | U  | 0.01   | 0.00   | 0.00  | 0.01  | 0.01   | -1.00 | 0.317        |
|          | LA | 0.01   | 0.43   | 0.25  | 0.01  | 0.75   |       |              |
| MCP-1    | U  | 0.11   | 0.00   | 0.00  | 0.11  | 0.11   | -1.00 | 0.317        |
|          | LA | 0.11   | 0.19   | 0.11  | 0.11  | 0.44   |       |              |
| MCP-3    | U  | 0.02   | 0.00   | 0.00  | 0.02  | 0.02   | -1.55 | 0.121        |
|          | LA | 0.13   | 0.24   | 0.14  | 0.02  | 0.48   |       |              |
| MIF      | U  | 28.94  | 35.92  | 20.74 | 8.12  | 78.07  | -0.65 | 0.513        |
|          | LA | 3.62   | 156.11 | 90.13 | 1.68  | 273.04 |       |              |
| MIG      | U  | 0.04   | 0.00   | 0.00  | 0.04  | 0.04   | 0.00  | 1.000        |

|         |    |      |       |       |      |        |       |       |
|---------|----|------|-------|-------|------|--------|-------|-------|
|         | LA | 0.04 | 0.00  | 0.00  | 0.04 | 0.04   |       |       |
| MIP-1a  | U  | 0.03 | 0.00  | 0.00  | 0.03 | 0.03   | -1.00 | 0.317 |
|         | LA | 0.03 | 0.02  | 0.01  | 0.03 | 0.06   |       |       |
| MIP-1b  | U  | 0.87 | 3.02  | 1.75  | 0.20 | 5.74   | -1.55 | 0.121 |
|         | LA | 0.20 | 0.00  | 0.00  | 0.20 | 0.20   |       |       |
| PDGF-BB | U  | 0.24 | 1.28  | 0.74  | 0.24 | 2.45   | -0.26 | 0.796 |
|         | LA | 0.24 | 8.55  | 4.94  | 0.24 | 15.05  |       |       |
| RANTES  | U  | 0.01 | 0.84  | 0.48  | 0.01 | 1.46   | -1.00 | 0.317 |
|         | LA | 0.01 | 0.00  | 0.00  | 0.01 | 0.01   |       |       |
| SCF     | U  | 0.02 | 0.00  | 0.00  | 0.02 | 0.02   | 0.00  | 1.000 |
|         | LA | 0.02 | 0.00  | 0.00  | 0.02 | 0.02   |       |       |
| SCGF-b  | U  | 7.82 | 0.00  | 0.00  | 7.82 | 7.82   | -1.00 | 0.317 |
|         | LA | 7.82 | 92.16 | 53.21 | 7.82 | 167.45 |       |       |
| SDF-1a  | U  | 1.52 | 1.20  | 0.69  | 1.52 | 3.59   | -0.70 | 0.487 |
|         | LA | 2.96 | 1.51  | 0.87  | 1.52 | 4.54   |       |       |
| TNF-a   | U  | 0.14 | 0.00  | 0.00  | 0.14 | 0.14   | 0.00  | 1.000 |
|         | LA | 0.14 | 0.00  | 0.00  | 0.14 | 0.14   |       |       |
| TNF-b   | U  | 0.30 | 0.00  | 0.00  | 0.30 | 0.30   | 0.00  | 1.000 |
|         | LA | 0.30 | 0.00  | 0.00  | 0.30 | 0.30   |       |       |
| TRAIL   | U  | 0.10 | 0.40  | 0.23  | 0.10 | 0.80   | -1.00 | 0.317 |
|         | LA | 0.10 | 0.00  | 0.00  | 0.10 | 0.10   |       |       |
| VEGF    | U  | 5.35 | 0.00  | 0.00  | 5.35 | 5.35   | 0.00  | 1.000 |
|         | LA | 5.35 | 0.00  | 0.00  | 5.35 | 5.35   |       |       |
| b-NGF   | U  | 0.85 | 0.00  | 0.00  | 0.85 | 0.85   | 0.00  | 1.000 |
|         | LA | 0.85 | 0.00  | 0.00  | 0.85 | 0.85   |       |       |
| bFGF    | U  | 1.02 | 0.00  | 0.00  | 1.02 | 1.02   | -1.00 | 0.317 |
|         | LA | 1.02 | 0.88  | 0.51  | 1.02 | 2.54   |       |       |

**SD:** Standard deviation, **SE:** Standard error, **Min:** Minimum, **Max:** maximum.

P value was calculated using Mann-Whitney U test. P values less than 0.05 was shown in bold. **U:** Untreated, **LA:** LPS/ATP (n=3)

**Table S12.** NLRP3 expression in MCF7 cells after tamoxifen, mifepristone, and trastuzumab and their combined treatments

| Comparisons           | Mean Difference | Std. E. | P     | 95% CI |       |
|-----------------------|-----------------|---------|-------|--------|-------|
|                       |                 |         |       | Lower  | Upper |
| L/L-Tx                | -0,27           | 0,07    | 0,050 | -0,54  | 0,00  |
| L/L-mife              | 0,19            | 0,07    | 0,250 | -0,09  | 0,46  |
| L/L-Tmab              | -0,05           | 0,07    | 0,988 | -0,33  | 0,22  |
| L/L-Tx-Mife           | 0,05            | 0,07    | 0,996 | -0,23  | 0,32  |
| L/L-Mife-Tmab         | 0,02            | 0,07    | 1,000 | -0,25  | 0,29  |
| L/L-Tx-Tmab           | -0,28           | 0,07    | 0,044 | -0,55  | -0,01 |
| L/L-Tx-Mife-Tmab      | 0,24            | 0,07    | 0,101 | -0,04  | 0,51  |
| L-Tx/L-mife           | 0,46            | 0,07    | 0,002 | 0,18   | 0,73  |
| L-Tx/L-Tmab           | 0,22            | 0,07    | 0,146 | -0,06  | 0,49  |
| L-Tx/L-Tx-Mife        | 0,32            | 0,07    | 0,023 | 0,04   | 0,59  |
| L-Tx/L-Mife-Tmab      | 0,29            | 0,07    | 0,036 | 0,02   | 0,56  |
| L-Tx/L-Tx-Tmab        | -0,01           | 0,07    | 1,000 | -0,28  | 0,26  |
| L-Tx/L-Tx-Mife-Tmab   | 0,51            | 0,07    | 0,001 | 0,23   | 0,78  |
| L-mife/L-Tmab         | -0,24           | 0,07    | 0,092 | -0,51  | 0,03  |
| L-mife/L-Tx-Mife      | -0,14           | 0,07    | 0,516 | -0,41  | 0,13  |
| L-mife/L-Mife-Tmab    | -0,17           | 0,07    | 0,352 | -0,44  | 0,11  |
| L-mife/L-Tx-Tmab      | -0,47           | 0,07    | 0,002 | -0,74  | -0,19 |
| L-mife/L-Tx-Mife-Tmab | 0,05            | 0,07    | 0,993 | -0,22  | 0,32  |

|                            |       |      |       |       |       |
|----------------------------|-------|------|-------|-------|-------|
| L-Tmab/L-Tx-Mife           | 0,10  | 0,07 | 0,813 | -0,17 | 0,37  |
| L-Tmab/L-Mife-Tmab         | 0,08  | 0,07 | 0,943 | -0,20 | 0,35  |
| L-Tmab/L-Tx-Tmab           | -0,23 | 0,07 | 0,121 | -0,50 | 0,05  |
| L-Tmab/L-Tx-Mife-Tmab      | 0,29  | 0,07 | 0,036 | 0,02  | 0,56  |
| L-Tx-Mife/L-Mife-Tmab      | -0,03 | 0,07 | 1,000 | -0,30 | 0,25  |
| L-Tx-Mife/L-Tx-Tmab        | -0,33 | 0,07 | 0,020 | -0,60 | -0,05 |
| L-Tx-Mife/L-Tx-Mife-Tmab   | 0,19  | 0,07 | 0,229 | -0,08 | 0,46  |
| L-Mife-Tmab/L-Tx-Tmab      | -0,30 | 0,07 | 0,030 | -0,57 | -0,03 |
| L-Mife-Tmab/L-Tx-Mife-Tmab | 0,22  | 0,07 | 0,146 | -0,06 | 0,49  |
| L-Tx-Tmab/L-Tx-Mife-Tmab   | 0,52  | 0,07 | 0,001 | 0,24  | 0,79  |

P-value calculated using One Way Anova and Tukey Test. The mean difference is significant at the 0.05 level and showed in bold. U: Untreated. L: LPS. LA: LPS/ATP. n=3.

**Table S13.** IL-1 $\beta$  secretion of LPS primed MCF7 cells after tamoxifen, mifepristone, and trastuzumab and their combined treatments.

|                       | Mean Difference | Std. E | P                | 95% CI |       |
|-----------------------|-----------------|--------|------------------|--------|-------|
|                       |                 |        |                  | Lower  | Upper |
| L-L/Tx                | -0.89           | 0.23   | <b>0.027</b>     | -1.70  | -0.08 |
| L-L/mife              | 0.96            | 0.23   | <b>0.015</b>     | 0.14   | 1.77  |
| L-L/Tmab              | 0.70            | 0.23   | 0.115            | -0.11  | 1.52  |
| L-L/Tx/Mife           | 0.75            | 0.23   | 0.083            | -0.06  | 1.56  |
| L-L/mife/Tmab         | 0.03            | 0.23   | 1.000            | -0.78  | 0.84  |
| L-L/Tx/Tmab           | -0.20           | 0.23   | 0.985            | -1.02  | 0.61  |
| L-L/Tx/mife/Tmab      | 0.03            | 0.23   | 1.000            | -0.78  | 0.84  |
| L-Lx-L/mife           | 1.85            | 0.23   | <b>&lt;0.001</b> | 1.03   | 2.66  |
| L/Tx-L/Tmab           | 1.59            | 0.23   | <b>&lt;0.001</b> | 0.78   | 2.40  |
| L/Tx-L/Tx/Mife        | 1.64            | 0.23   | <b>&lt;0.001</b> | 0.83   | 2.45  |
| L/Tx-L/mife/Tmab      | 0.92            | 0.23   | <b>0.021</b>     | 0.11   | 1.73  |
| L/Tx-L/Tx/Tmab        | 0.69            | 0.23   | 0.132            | -0.13  | 1.50  |
| L/Tx-L/Tx/mife/Tmab   | 0.92            | 0.23   | <b>0.021</b>     | 0.11   | 1.73  |
| L/mife-L/Tmab         | -0.25           | 0.23   | 0.953            | -1.06  | 0.56  |
| L/mife-L/Tx/Mife      | -0.21           | 0.23   | 0.983            | -1.02  | 0.60  |
| L/mife-L/mife/Tmab    | -0.93           | 0.23   | <b>0.020</b>     | -1.74  | -0.12 |
| L/mife-L/Tx/Tmab      | -1.16           | 0.23   | <b>0.003</b>     | -1.97  | -0.35 |
| L/mife-L/Tx/mife/Tmab | -0.93           | 0.23   | <b>0.020</b>     | -1.74  | -0.12 |
| L/Tmab-L/Tx/Mife      | 0.04            | 0.23   | 1.000            | -0.77  | 0.86  |
| L/Tmab-L/mife/Tmab    | -0.67           | 0.23   | 0.143            | -1.49  | 0.14  |

|                            |       |      |              |       |       |
|----------------------------|-------|------|--------------|-------|-------|
| L/Tmab-L/Tx/Tmab           | -0.91 | 0.23 | <b>0.023</b> | -1.72 | -0.10 |
| L/Tmab-L/Tx/mife/Tmab      | -0.67 | 0.23 | 0.143        | -1.49 | 0.14  |
| L/Tx/Mife-L/mife/Tmab      | -0.72 | 0.23 | 0.103        | -1.53 | 0.09  |
| L/Tx/Mife-L/Tx/Tmab        | -0.95 | 0.23 | <b>0.016</b> | -1.76 | -0.14 |
| L/Tx/Mife-L/Tx/mife/Tmab   | -0.72 | 0.23 | 0.103        | -1.53 | 0.09  |
| L/mife/Tmab-L/Tx/Tmab      | -0.23 | 0.23 | 0.969        | -1.04 | 0.58  |
| L/mife/Tmab-L/Tx/mife/Tmab | 0.00  | 0.23 | 1.000        | -0.81 | 0.81  |
| L/Tx/Tmab-L/Tx/mife/Tmab   | 0.23  | 0.23 | 0.969        | -0.58 | 1.04  |

P-value calculated using One Way Anova and Tukey Test. The mean difference is significant at the 0.05 level and showed in bold. U:

Untreated. L: LPS. LA: LPS/ATP. n=3.

**Table S14.** The time-dependent changes in tumospheres formed by MCF7 cells after LPS/Tamoxifen treatment

| Cell line | Treatment | Comparison of incubation time | Mean Difference in sphere size | Std. E. | P                | 95% CI  |         |
|-----------|-----------|-------------------------------|--------------------------------|---------|------------------|---------|---------|
|           |           |                               |                                |         |                  | Lower   | Upper   |
| MCF7      | LTx       | 0h-4h                         | 526.32                         | 38.62   | <b>&lt;0.001</b> | 418.21  | 634.42  |
|           |           | 0h-24h                        | -107.84                        | 38.62   | 0.051            | -215.94 | 0.27    |
|           |           | 0h-48h                        | -147.63                        | 38.62   | <b>0.005</b>     | -255.73 | -39.52  |
|           |           | 4h-24h                        | -634.15                        | 38.62   | <b>&lt;0.001</b> | -742.25 | -526.05 |
|           |           | 4h-48h                        | -673.94                        | 38.62   | <b>&lt;0.001</b> | -782.04 | -565.84 |
|           |           | 24h-48h                       | -39.79                         | 38.62   | 0.734            | -147.89 | 68.31   |

P-value calculated using One Way Anova and Tukey Test. The mean difference is significant at the 0.05 level and showed in bold. **LTx:**

LPS/Tamoxifen. n=5.

**Table S15.** The comparison of tumosphere size formed by MCF7 cells upon 4, 24 and 48 hours of incubation with LPS, LPS/ATP or LPS/Tamoxifen.

| Cell line | Incubation time | Treatment | Mean Difference in sphere size | Std. E. | P                | 95% CI  |        |
|-----------|-----------------|-----------|--------------------------------|---------|------------------|---------|--------|
|           |                 |           |                                |         |                  | Lower   | Upper  |
| MCF7      | 4h              | L-LA      | 19.90                          | 31.37   | 0.804            | -62.21  | 102.01 |
|           |                 | L-LTx     | 489.47                         | 31.37   | <b>&lt;0.001</b> | 407.36  | 571.58 |
|           |                 | LA-LTx    | 469.57                         | 29.91   | <b>&lt;0.001</b> | 391.28  | 547.86 |
|           | 24h             | L-LA      | 99.85                          | 49.33   | 0.149            | -31.75  | 231.45 |
|           |                 | L-LTx     | -85.48                         | 44.53   | 0.175            | -204.27 | 33.31  |
|           |                 | LA-LTx    | -185.33                        | 47.46   | <b>0.005</b>     | -311.96 | -58.70 |
|           | 48h             | L-LA      | 32.18                          | 36.39   | 0.659            | -63.07  | 127.42 |
|           |                 | L-LTx     | -119.94                        | 36.39   | <b>0.014</b>     | -215.18 | -24.69 |
|           |                 | LA-LTx    | -152.12                        | 34.70   | <b>0.002</b>     | -242.93 | -61.30 |

P-value calculated using One Way Anova and Tukey Test. The mean difference is significant at the 0.05 level and showed in bold. **LTx:**

LPS/Tamoxifen. n=5.

**Table S16.** The time-dependent changes in recovery of scratched wounded area of MCF7 cells after LPS/Tamoxifen treatment

| Treatment | Comparison of the incubation time | Mean Difference | Std. E | P     | 95% CI           |        |        |
|-----------|-----------------------------------|-----------------|--------|-------|------------------|--------|--------|
|           |                                   |                 |        |       | Lower            | Upper  |        |
| MCF7      | LTx                               | 0h-4h           | 22.21  | 18.26 | 0.628            | -31.39 | 75.81  |
|           |                                   | 0h-24h          | 30.82  | 19.88 | 0.438            | -27.54 | 89.17  |
|           |                                   | 0h-48h          | 179.77 | 17.22 | <b>&lt;0.001</b> | 129.24 | 230.31 |
|           |                                   | 4h-24h          | 8.61   | 20.79 | 0.975            | -52.42 | 69.63  |
|           |                                   | 4h-48h          | 157.56 | 18.26 | <b>&lt;0.001</b> | 103.96 | 211.16 |
|           |                                   | 24h-48h         | 148.96 | 19.88 | <b>&lt;0.001</b> | 90.61  | 207.31 |

P-value calculated using One Way Anova and Tukey Test. The mean difference is significant at the 0.05 level and showed in bold. **LTx**: LPS/Tamoxifen. n=5.

**Table S17.** The recovery of scratched wounded area in MCF7 cells upon 4, 24 and 48 hours of incubation with LPS, LPS/ATP or LPS/Tamoxifen.

| Cell line | Incubation time | Comparisons | Mean Difference | Std. E | P                | 95% CI  |        |
|-----------|-----------------|-------------|-----------------|--------|------------------|---------|--------|
|           |                 |             |                 |        |                  | Lower   | Upper  |
| MCF7      | 4h              | L-LA        | -47.83          | 24.38  | 0.177            | -115.90 | 20.23  |
|           |                 | L-LTx       | 8.17            | 21.41  | 0.923            | -51.61  | 67.95  |
|           |                 | LA-LTx      | 56.01           | 23.31  | 0.091            | -9.07   | 121.09 |
|           | 24h             | L-LA        | -104.60         | 27.72  | <b>0.011</b>     | -182.00 | -27.20 |
|           |                 | L-LTx       | -53.97          | 30.18  | 0.228            | -138.23 | 30.29  |
|           |                 | LA-LTx      | 50.63           | 31.56  | 0.293            | -37.49  | 138.75 |
|           | 48h             | L-LA        | -135.27         | 27.63  | <b>0.002</b>     | -211.02 | -59.52 |
|           |                 | L-LTx       | 40.99           | 23.93  | 0.248            | -24.61  | 106.59 |
|           |                 | LA-LTx      | 176.25          | 27.63  | <b>&lt;0.001</b> | 100.50  | 252.01 |

P-value calculated using One Way Anova and Tukey Test. The mean difference is significant at the 0.05 level and showed in bold. **L**: LPS; **LA**: LPS/ATP; **LTx**: LPS/Tamoxifen. n=5.

**Table S18.** Cytokine secretion levels in MCF7 cells after LPS-only, LPS/ATP and LPS/Tamoxifen treatments.

|       |     | Median | Std. Deviation | Std. Error of Mean | Minimum | Maximum | P     |        | Z     | P            |
|-------|-----|--------|----------------|--------------------|---------|---------|-------|--------|-------|--------------|
| HGF   | U   | 0.45   | 1.02           | 0.59               | 0.10    | 2.02    | 0.035 | U-L    | -0.89 | 0.376        |
|       | L   | 1.88   | 0.20           | 0.12               | 1.62    | 2.02    |       | U-LA   | -1.96 | <b>0.050</b> |
|       | LA  | 3.34   | 0.02           | 0.01               | 3.32    | 3.36    |       | U-LTx  | -1.62 | 0.105        |
|       | LTx | 2.02   | 0.20           | 0.11               | 2.02    | 2.36    |       | L-LA   | -1.96 | <b>0.050</b> |
|       |     |        |                |                    |         |         |       | L-LTx  | -1.62 | 0.105        |
|       |     |        |                |                    |         |         |       | LA-LTx | -1.99 | <b>0.046</b> |
| IL8   | U   | 0.26   | 0.00           | 0.00               | 0.26    | 0.26    | 0.023 | U-L    | 0.00  | 1.000        |
|       | L   | 0.26   | 0.00           | 0.00               | 0.26    | 0.26    |       | U-LA   | -2.09 | <b>0.037</b> |
|       | LA  | 3.83   | 0.21           | 0.12               | 3.50    | 3.90    |       | U-LTx  | -1.96 | <b>0.050</b> |
|       | LTx | 3.36   | 0.21           | 0.15               | 3.21    | 3.50    |       | L-LA   | -2.09 | <b>0.037</b> |
|       |     |        |                |                    |         |         |       | L-LTx  | -1.96 | <b>0.050</b> |
|       |     |        |                |                    |         |         |       | LA-LTx | -1.48 | 0.139        |
| MCP1  | U   | 0.11   | 0.00           | 0.00               | 0.11    | 0.11    | 0.392 | U-L    | 0.00  | 1.000        |
|       | L   | 0.11   | 0.00           | 0.00               | 0.11    | 0.11    |       | U-LA   | -1.00 | 0.317        |
|       | LA  | 0.11   | 0.19           | 0.11               | 0.11    | 0.44    |       | U-LTx  | 0.00  | 1.000        |
|       | LTx | 0.11   | 0.00           | 0.00               | 0.11    | 0.11    |       | L-LA   | -1.00 | 0.317        |
|       |     |        |                |                    |         |         |       | L-LTx  | 0.00  | 1.000        |
|       |     |        |                |                    |         |         |       | LA-LTx | -1.00 | 0.317        |
| SCGFb | U   | 7.82   | 0.00           | 0.00               | 7.82    | 7.82    | 0.013 | U-L    | 0.00  | 1.000        |
|       | L   | 7.82   | 0.00           | 0.00               | 7.82    | 7.82    |       | U-LA   | -2.09 | <b>0.037</b> |
|       | LA  | 167.50 | 0.30           | 0.18               | 167.45  | 168.00  |       | U-LTx  | -2.24 | <b>0.025</b> |
|       | LTx | 118.12 | 0.00           | 0.00               | 118.12  | 118.12  |       | L-LA   | -2.09 | <b>0.037</b> |
|       |     |        |                |                    |         |         |       | L-LTx  | -2.24 | <b>0.025</b> |
|       |     |        |                |                    |         |         |       | LA-LTx | -2.09 | <b>0.037</b> |

**SD**: Standard deviation, **SE**: Standard error, **Min**: Minimum, **Max**: maximum.

P value was calculated using Independent-Samples Kruskal-Wallis Test. P values less than 0.05 was shown in bold. **U**: Untreated, **LA**: LPS/ATP (n=3)
